# Supplementary material for: Thickness Dependence of Electronic Structure and Optical Properties of F8BT Thin Films
Source: MDPI journal article supplement (doi:10.3390/polym14030641), 2022-02-08
Supplement: s1 [file s1]

Supplementary Information

# Thickness dependence of electronic structure and optical properties of F8BT thin films

Bitá Ghasemi <sup>1</sup>, Jakub Ševčík <sup>1</sup>, Vojtěch Nádaždy <sup>2</sup>, Karol Végső <sup>2</sup>, Peter Šiffalovič <sup>2</sup>, Pavel Urbánek <sup>1,\*</sup> and Ivo Kuřitka <sup>1</sup>

<sup>1</sup> Tomas Bata University in Zlin, Centre of Polymer Systems, Tr. Tomase Bati 5678, Zlin, CZ-760 01, Czech Republic

<sup>2</sup> Institute of Physics, Slovak Academy of Sciences, Dubravská cesta 9, Bratislava, SK-845 11, Slovak Republic

\* Correspondence: Correspondence: urbane@utb.cz

## Deconvolution of emission peaks

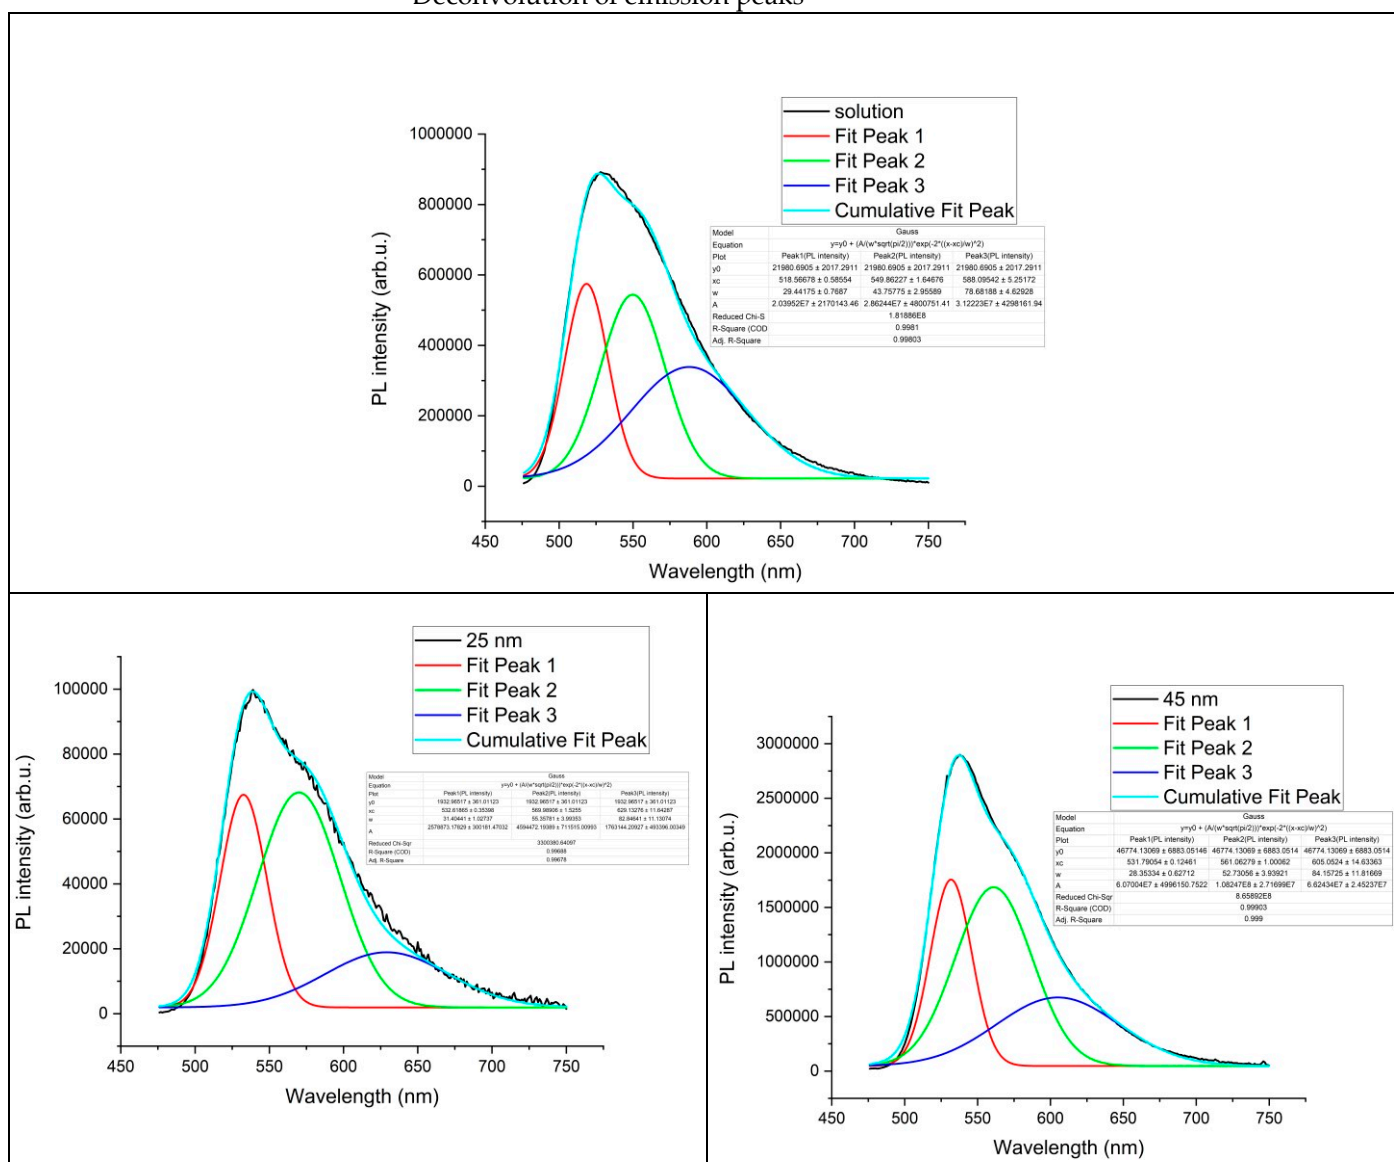

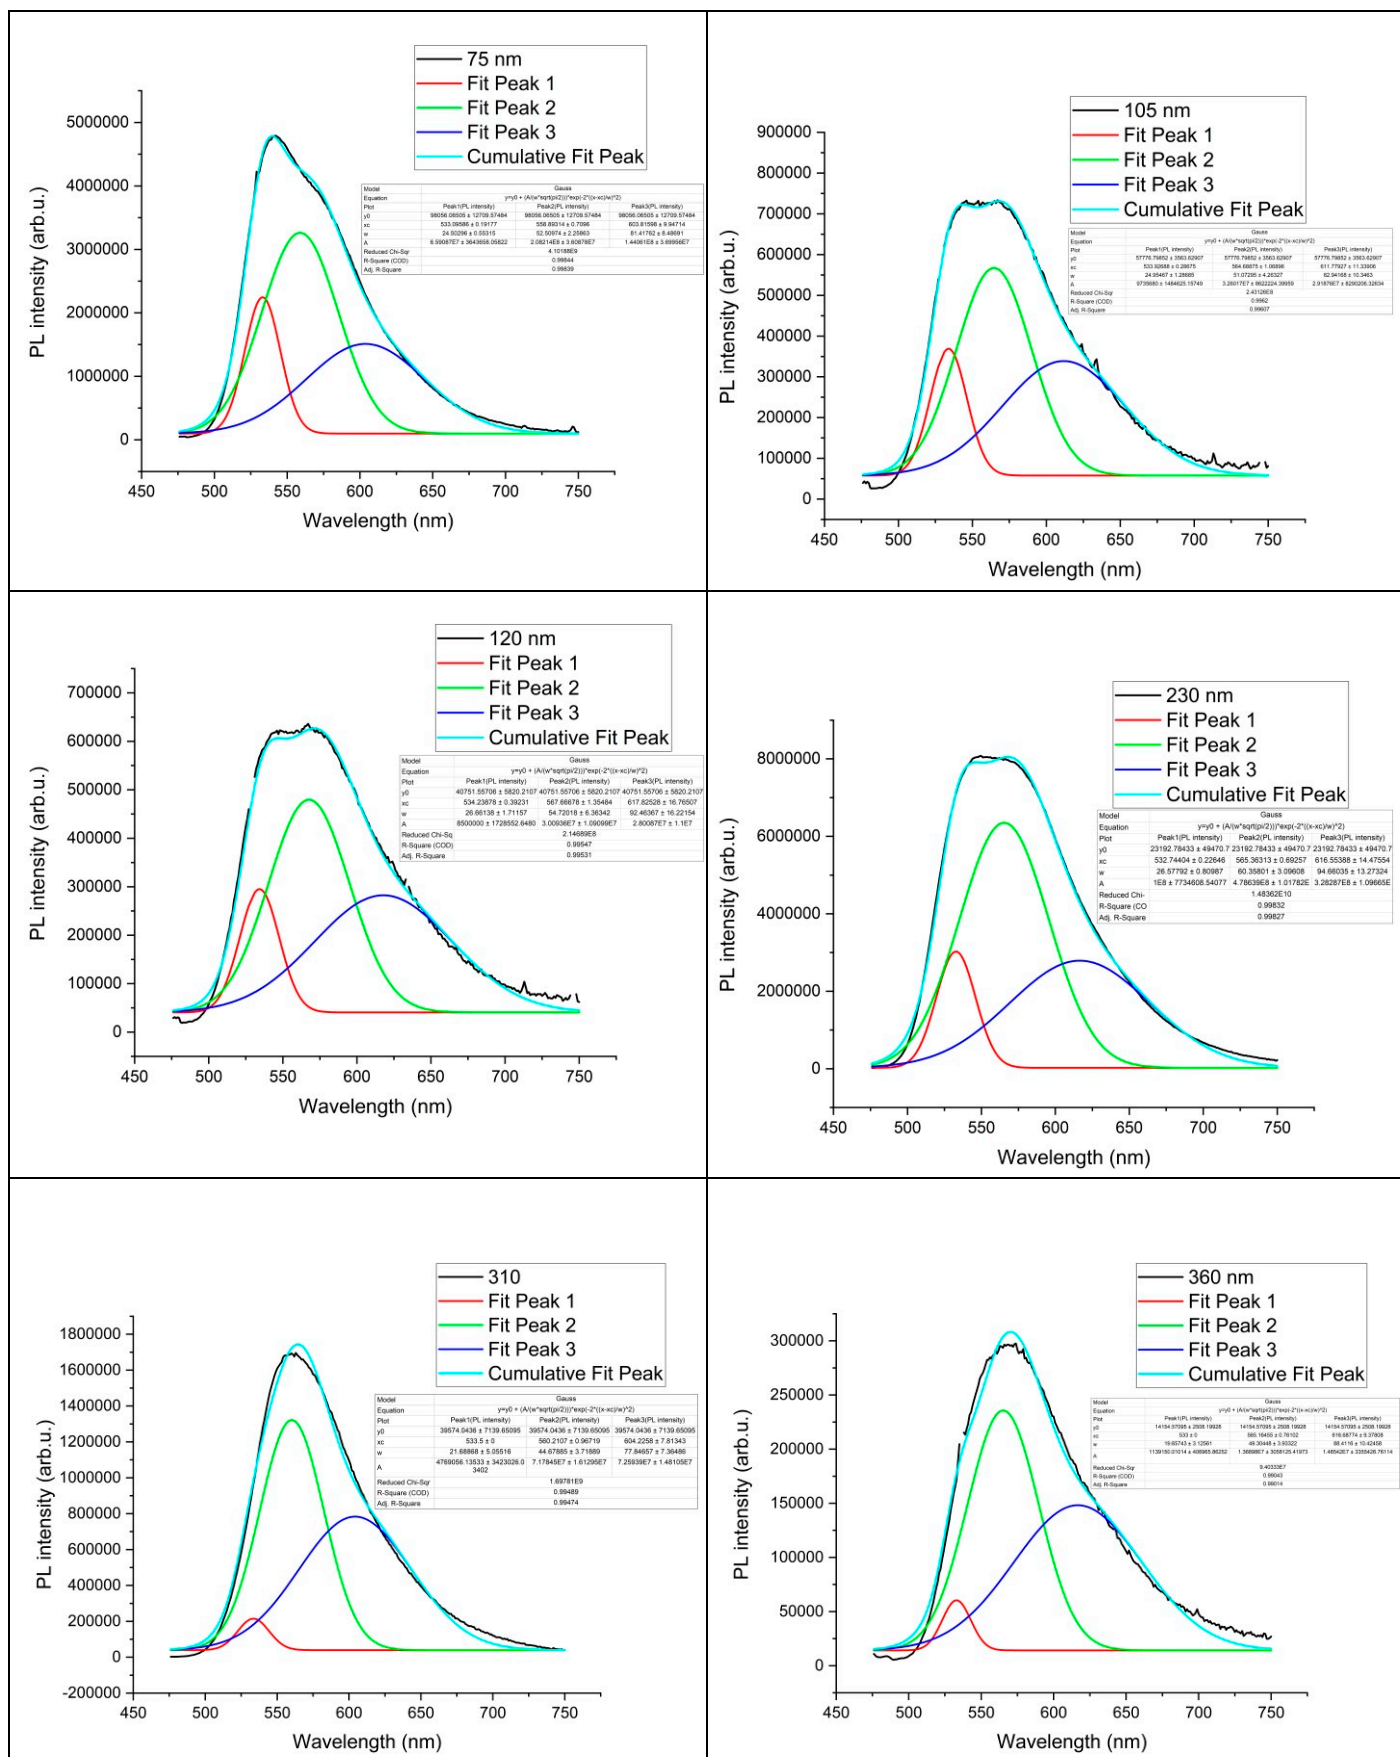

Figure S1 Deconvoluted PL emission peaks with their integrated areas.

# GIWAXS Patterns

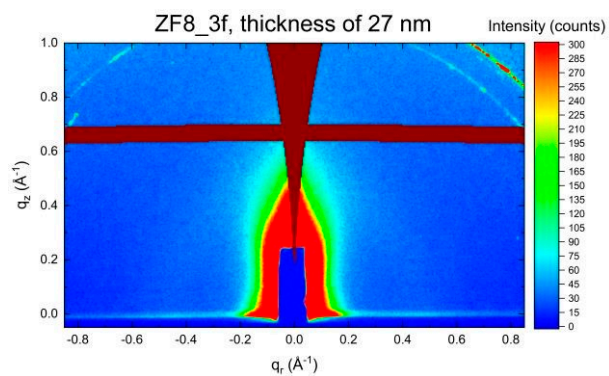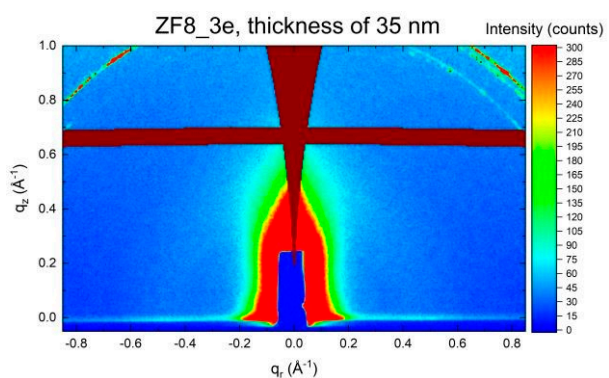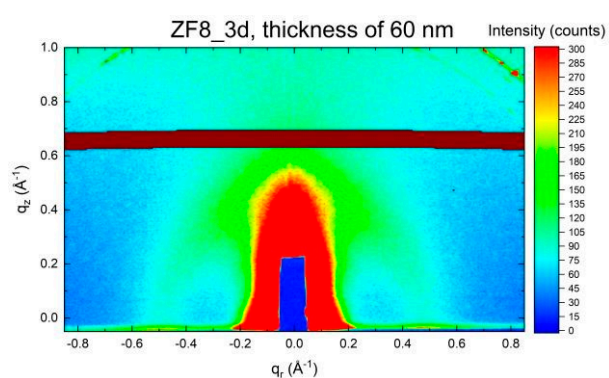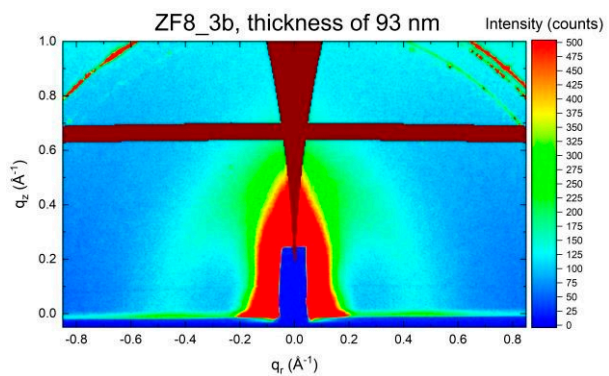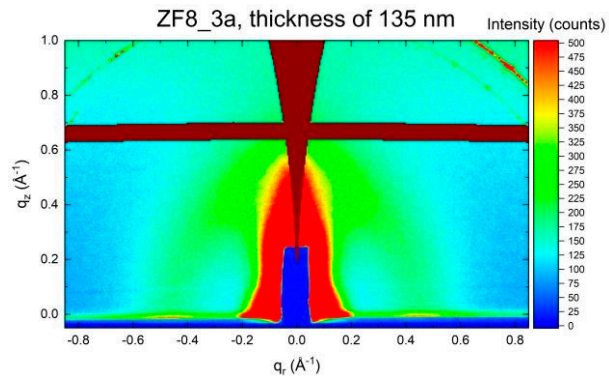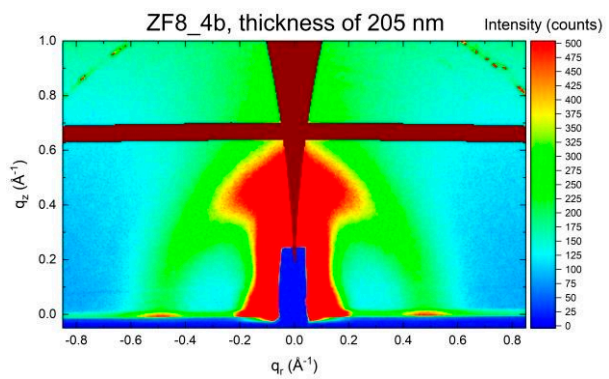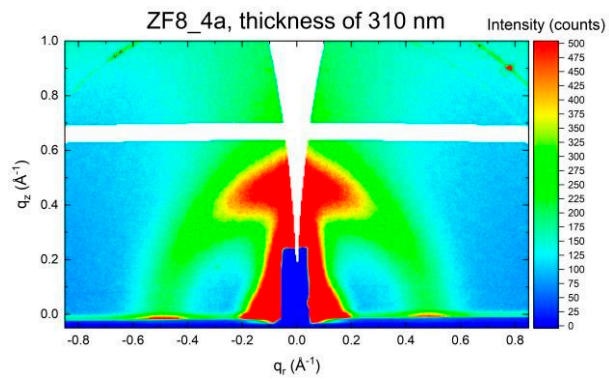

**Figure S2** The GIWAXS pattern of polymer layers showing the integration area of the horizontal diffraction peaks along  $q_r$  axis (white rectangle) and the principle of integration of the vertical diffraction peak along  $q_z$  axis between  $\chi = -20^\circ$  and  $\chi = 20^\circ$ . 18
